# Supplementary material for: Dispersion forces in chirality recognition – a density functional and wave function theory study of diols
Source: Royal Society of Chemistry journal article supplement (doi:10.1039/d1cp01225h), 2021-01-01
Supplement: d1cp01225h1.pdf [file d1cp01225h1.pdf]

Supporting information on:

# Dispersion forces in chirality recognition - a density functional and wave function theory study of diols

Xaiza Aniban,<sup>‡a</sup> Beppo Hartwig,<sup>‡a</sup> Axel Wuttke,<sup>a</sup> Ricardo A. Mata<sup>a\*</sup>

*a Institut für Physikalische Chemie, Georg-August-Universität Göttingen, Tammannstr. 6, 37077 Göttingen, Germany. E-mail: rmata@gwdg.de*

<sup>‡</sup> These authors contributed equally to this work.

## Contents

|                                                                       |           |
|-----------------------------------------------------------------------|-----------|
| <b>1 DFT data</b>                                                     | <b>1</b>  |
| <b>2 WFT data</b>                                                     | <b>4</b>  |
| <b>3 Geometry analysis data</b>                                       | <b>5</b>  |
| 3.1 Intermolecular hydrogen bond (Å), EDO . . . . .                   | 5         |
| 3.2 Intermolecular hydrogen bond (Å), CHexDO . . . . .                | 6         |
| 3.3 Intermolecular hydrogen bond (Å), Pinacol . . . . .               | 7         |
| 3.4 Generation of density plots in Figure 4 of the main text. . . . . | 8         |
| <b>4 Structures</b>                                                   | <b>9</b>  |
| <b>References</b>                                                     | <b>10</b> |

# 1 DFT data

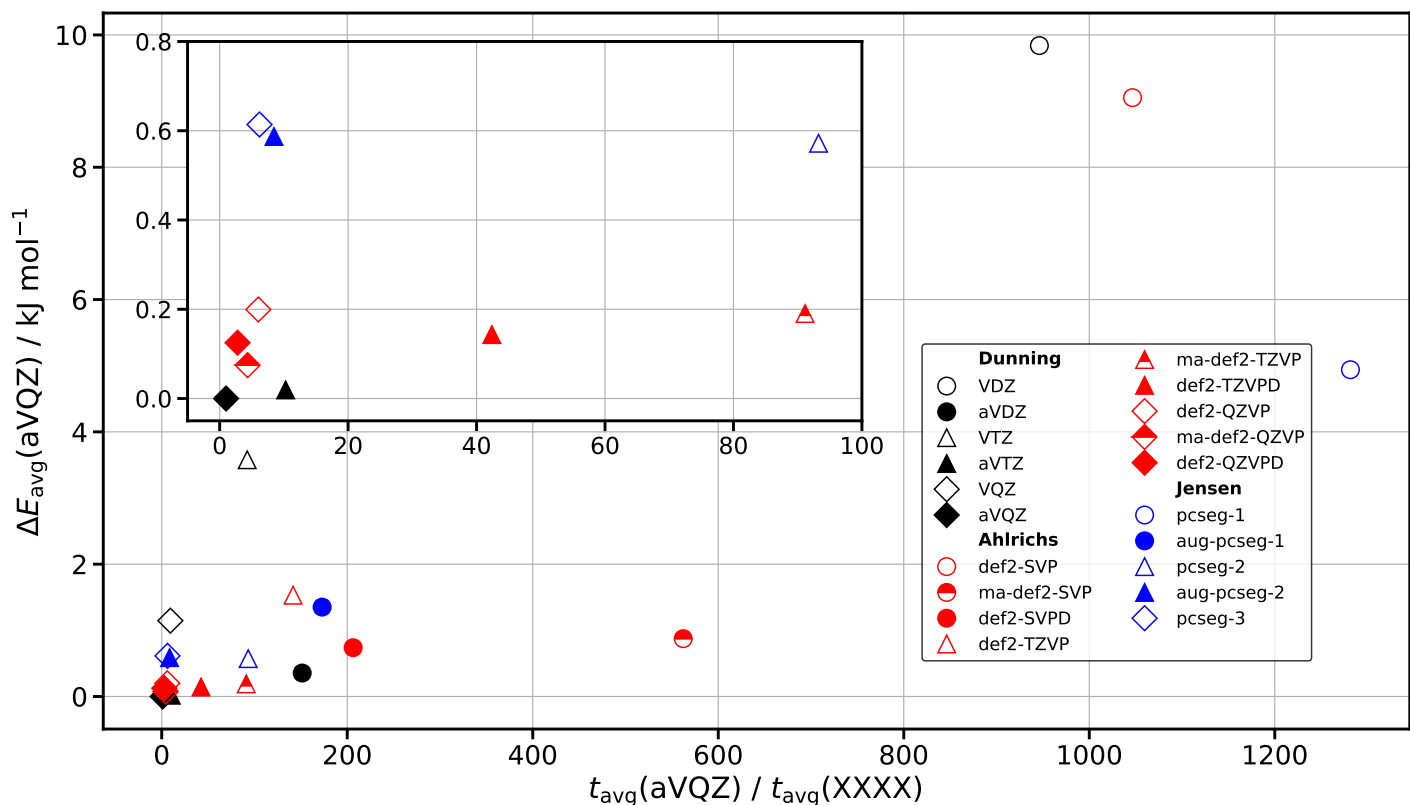

Fig. S1: Overview of the average energy difference relative to the Dunning aVQZ (aug-cc-pVQZ) basis set depending on the fraction of the computational time of aVQZ and each tested basis set. The fully augmented Dunning basis sets (aug-cc-pVXZ) as well as the non augmented variants (cc-pVXZ) were tested<sup>[1,2]</sup>. Furthermore the def2-XZVP Ahlrichs<sup>[3]</sup> family of basis sets were tested as well as the minimally augmented variants of Zheng et al.<sup>[4]</sup> and the property optimized heavily augmented variants of Rappoport et al.<sup>[5]</sup>. Additionally the augmented (aug-pcseg-X) and non augmented (pcseg-X) Jensen basis sets were tested<sup>[6]</sup>. The aug-pcseg-3 calculations did not converge. All calculations were made for a total of 8 different ethanediol dimers and then averaged. For comparable timings each calculation was done on the same node.

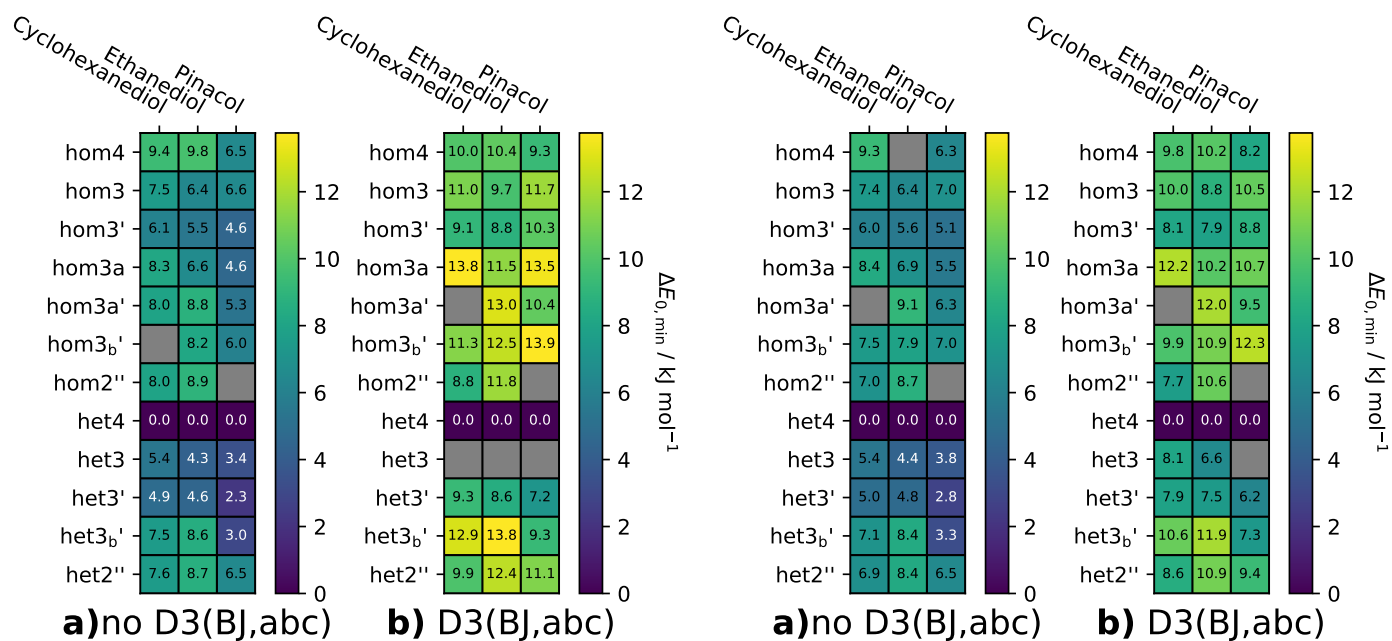

(a) BP86

(b) PBE

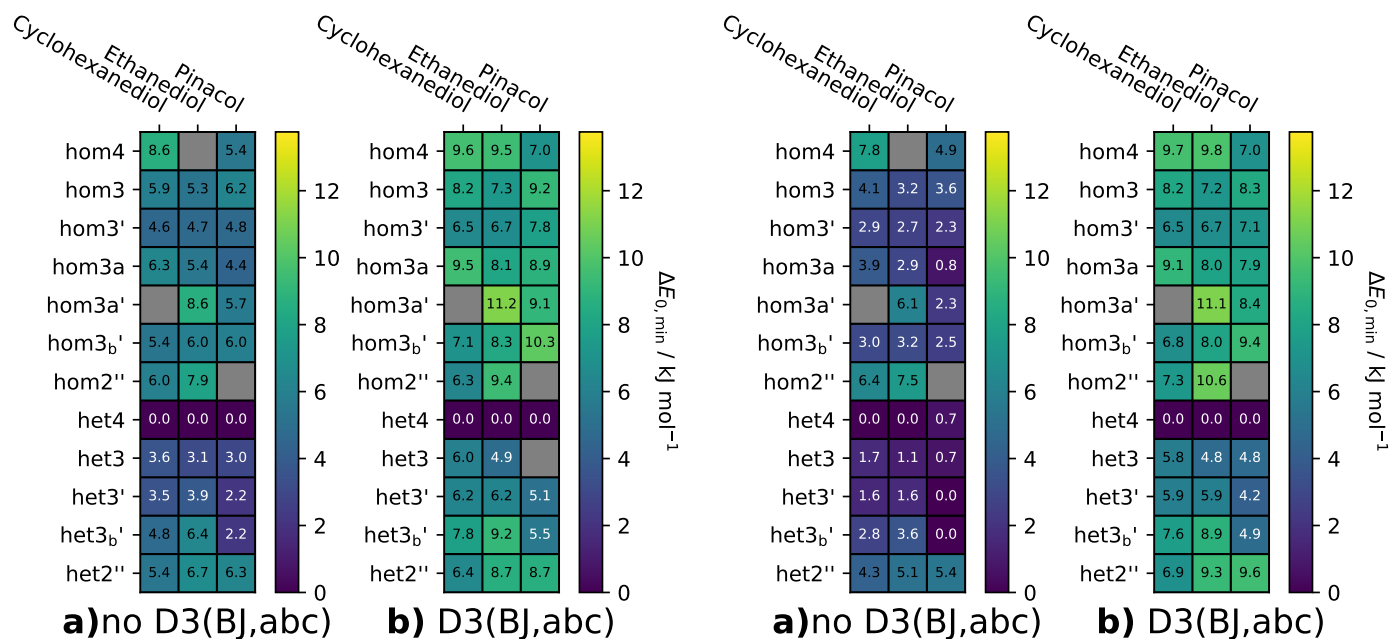

(c) PBE0

(d) B3LYP

Fig. S2: Overview of the DFT results with (b)) and without D3(BJ,abc) (a)) for cyclohexanediol, ethanediol and pinacol. The energies given are always relative to the minimum energy conformer and zero point corrected. Grey squares indicate unstable conformers.

**a) ethanediol**

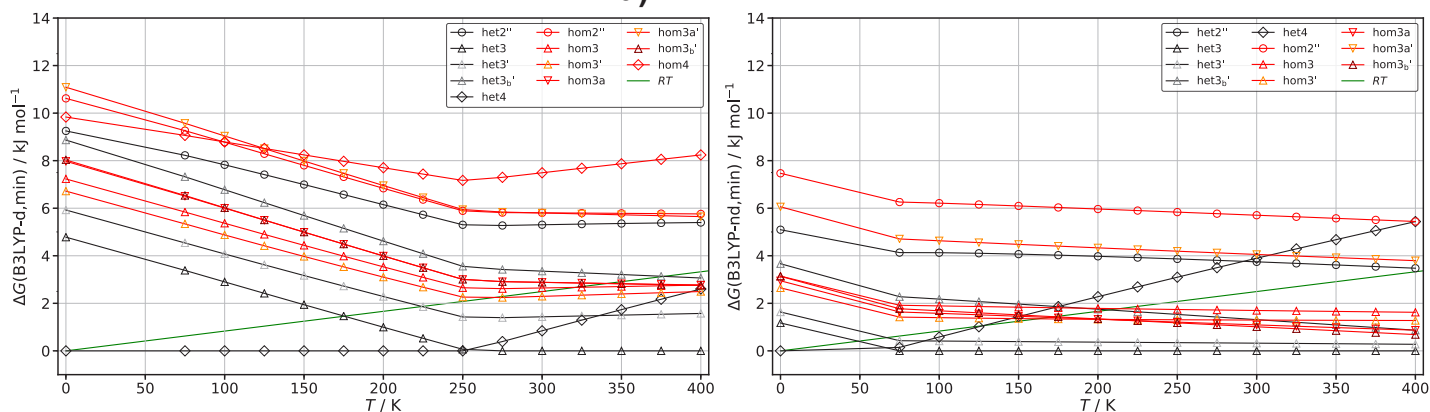

**b) cyclohexanediol**

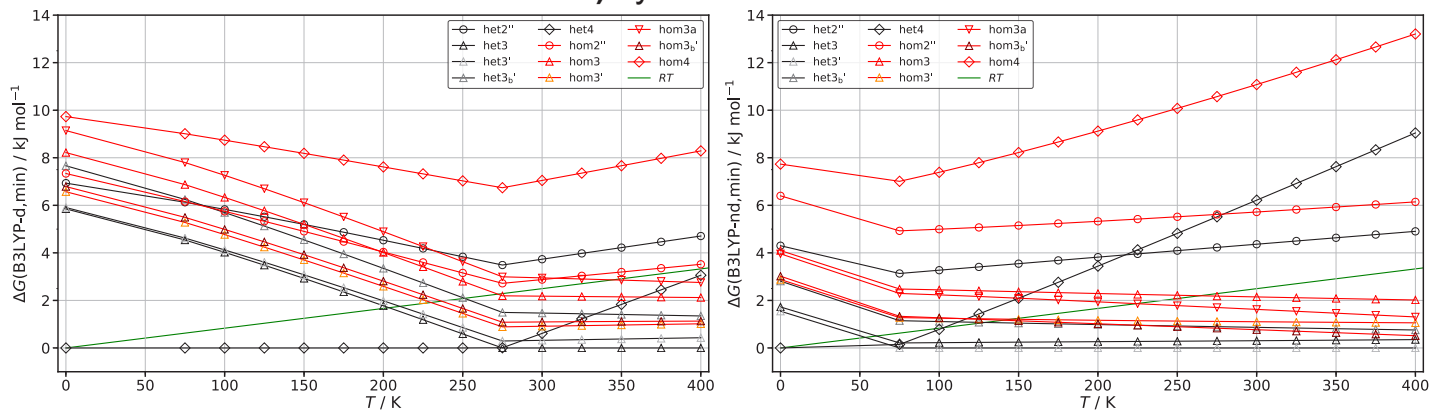

**c) pinacol**

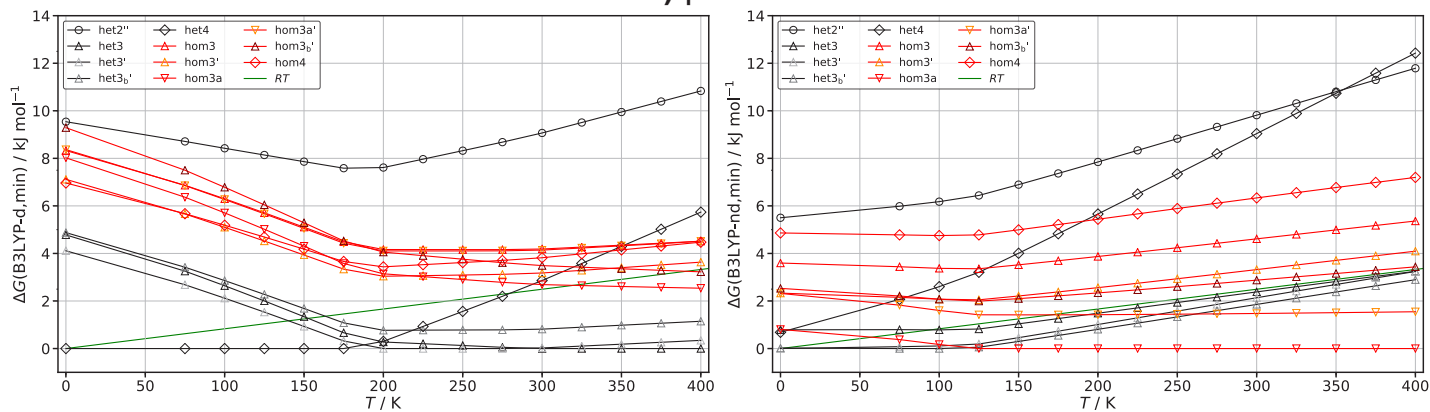

Fig. S3: Identical analysis as was done in Fig. 9 of the main text for ethanediol **a)**, cyclohexanediol **b)** and pinacol **c)** at the B3LYP level of computation.

## 2 WFT data

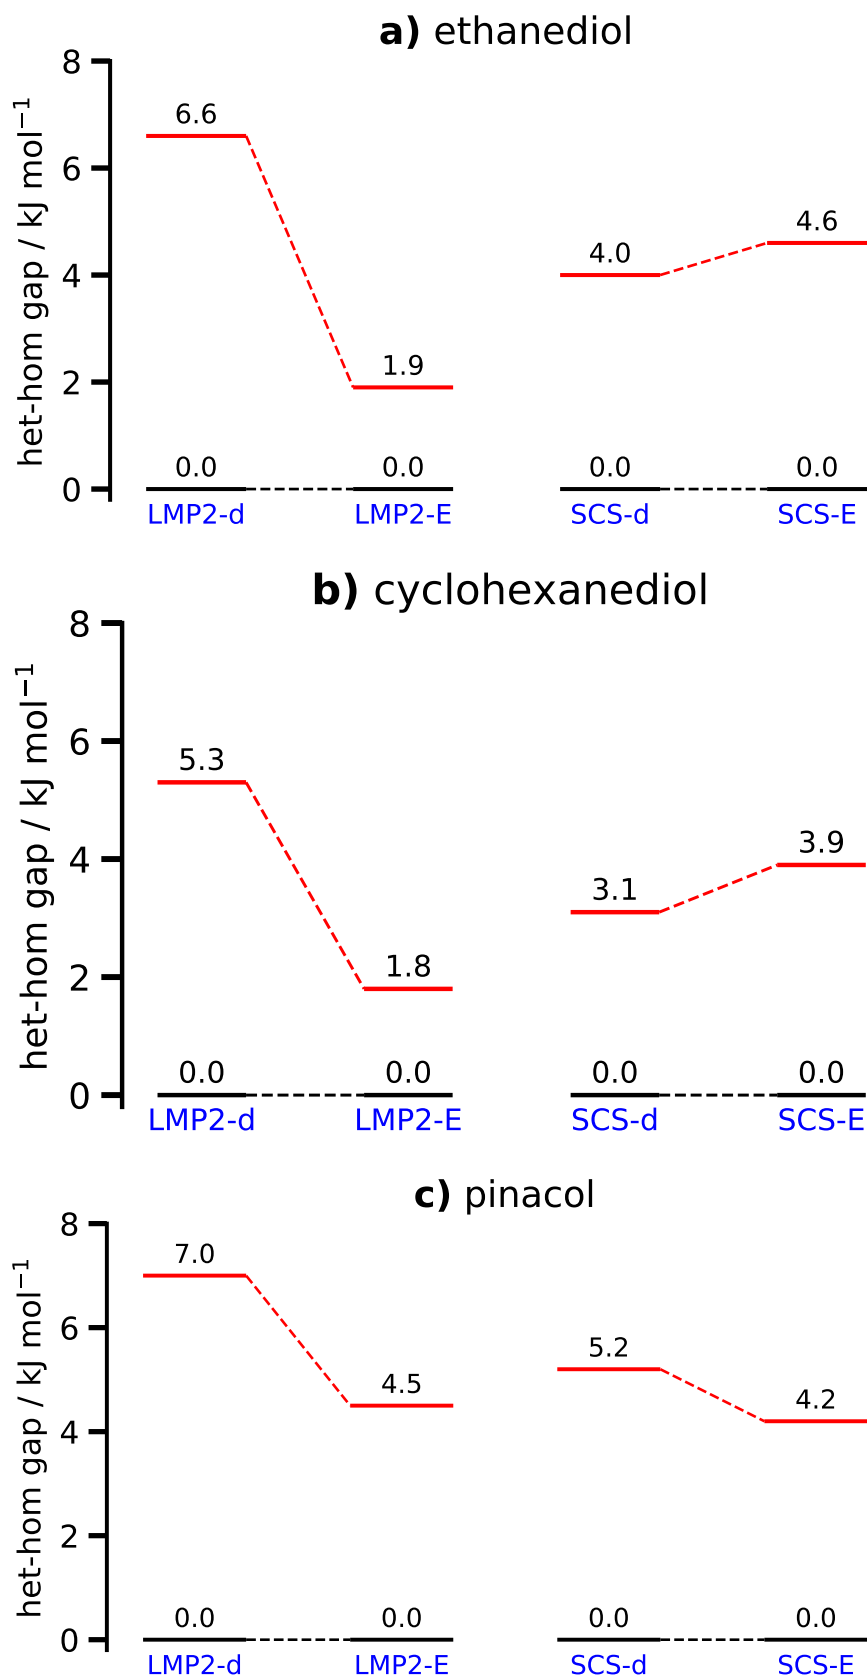

Fig. S4: Comparison of the LMP2-d and SCS-LMP2-d het-hom gap with the corresponding results purely based on the dispersion energy (LMP2-E and SCS-LMP2-E). The dispersion energy gap can also be inferred from Fig. 12 of the main text for SCS-LMP2 and figure S5 for LMP2.

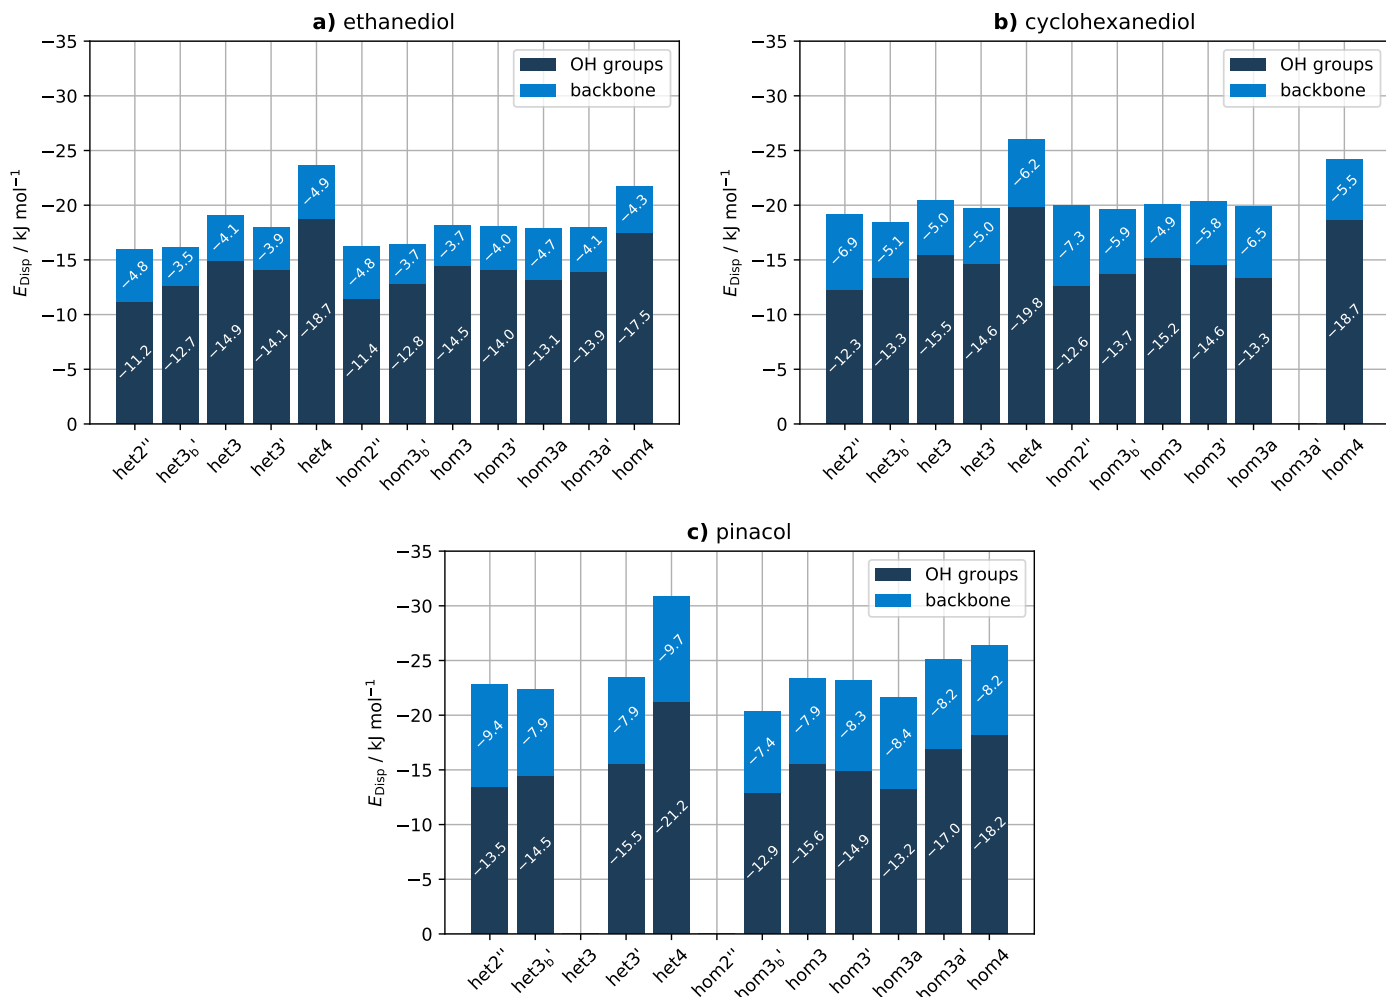

Fig. S5: Energy fragmentation of the dispersion energy at the LMP2-d level of computation for ethanediol (a), cyclohexanediol (b) and pinacol (c). A zero energy value indicates that a conformer either converges to a different one or exhibits an imaginary frequency. The performed analysis is analogous to that of Fig. 12 of the main text.

### 3 Geometry analysis data

#### 3.1 Intermolecular hydrogen bond (Å), EDO

Tab. S1: Intermolecular H-bonding optimized at LMP2/aug-cc-pVTZ,H=cc-pVTZ.

| Molecular System    | with dispersion |       |       |       | without dispersion |       |       |       |
|---------------------|-----------------|-------|-------|-------|--------------------|-------|-------|-------|
|                     | het2''          | 1.983 | 1.983 |       |                    | 2.133 | 2.133 |       |
| het3 <sub>b</sub> ' | 2.188           | 2.031 | 1.892 |       | 2.532              | 2.112 | 2.000 |       |
| het3                | 1.905           | 1.998 | 1.899 |       | 2.045              | 2.152 | 2.063 |       |
| het3'               | 1.928           | 1.976 | 1.920 |       | 2.085              | 2.131 | 2.100 |       |
| het4                | 1.959           | 1.959 | 1.959 | 1.959 | 2.111              | 2.111 | 2.111 | 2.111 |
| hom2                | 1.926           | 1.973 |       |       | 2.081              | 2.145 |       |       |
| hom3a               | 1.841           | 1.972 | 2.065 |       | 1.956              | 2.215 | 2.244 |       |
| hom3a'              | 1.822           | 1.961 | 2.021 |       | 2.034              | 3.390 | 2.046 |       |
| hom3 <sub>b</sub> ' | 2.145           | 1.983 | 1.886 |       | 2.491              | 2.083 | 2.006 |       |
| hom3                | 1.847           | 1.980 | 1.959 |       | 1.956              | 2.154 | 2.136 |       |
| hom3'               | 1.876           | 1.971 | 1.961 |       | 2.004              | 2.159 | 2.135 |       |

Tab. S2: Intermolecular H-bonding optimized at B3LYP/aug-cc-pVTZ,H=cc-pVTZ.

| Molecular System    | with dispersion |       |       |       | without dispersion |       |       |       |
|---------------------|-----------------|-------|-------|-------|--------------------|-------|-------|-------|
| het2''              | 1.939           | 1.939 |       |       | 1.980              | 1.980 |       |       |
| het3 <sub>b</sub> ' | 2.141           | 1.988 | 1.876 |       | 2.203              | 2.046 | 1.915 |       |
| het3                | 1.881           | 1.973 | 1.865 |       | 1.925              | 2.008 | 1.911 |       |
| het3'               | 1.885           | 1.943 | 1.877 |       | 1.913              | 2.000 | 1.935 |       |
| het4                | 1.951           | 1.951 | 1.951 | 1.951 | 1.997              | 1.997 | 1.997 | 1.997 |
| hom2''              | 1.898           | 1.932 |       |       | 1.957              | 1.977 |       |       |
| hom3a               | 1.810           | 1.926 | 2.018 |       | 1.832              | 1.998 | 2.091 |       |
| hom3a'              | 1.792           | 1.916 | 2.001 |       | 1.811              | 2.018 | 2.044 |       |
| hom3 <sub>b</sub> ' | 2.062           | 1.956 | 1.864 |       | 2.114              | 2.024 | 1.909 |       |
| hom3                | 1.828           | 1.940 | 1.916 |       | 1.852              | 2.015 | 1.987 |       |
| hom3'               | 1.841           | 1.935 | 1.921 |       | 1.870              | 2.019 | 1.990 |       |

Tab. S3: Intermolecular H-bonding optimized at SCS-LMP2/aug-cc-pVTZ,H=cc-pVTZ.

| Molecular System    | with dispersion |       |       |       | without dispersion |       |       |       |
|---------------------|-----------------|-------|-------|-------|--------------------|-------|-------|-------|
| het2''              | 2.052           | 2.052 |       |       | 2.178              | 2.178 |       |       |
| het3 <sub>b</sub> ' | 2.255           | 2.083 | 1.944 |       | 2.510              | 2.152 | 2.030 |       |
| het3                | 1.968           | 2.059 | 1.964 |       | 2.079              | 2.181 | 2.096 |       |
| het3'               | 1.997           | 2.038 | 1.992 |       | 2.119              | 2.161 | 2.133 |       |
| het4                | 2.024           | 2.024 | 2.024 | 2.024 | 2.144              | 2.144 | 2.144 | 2.144 |
| hom2''              | 1.992           | 2.051 |       |       | 2.116              | 2.196 |       |       |
| hom3a               | 1.897           | 2.051 | 2.140 |       | 1.987              | 2.250 | 2.288 |       |
| hom3a'              | 1.866           | 2.075 | 2.102 |       | 2.063              | 3.474 | 2.073 |       |
| hom3 <sub>b</sub> ' | 2.232           | 2.031 | 1.937 |       | 2.499              | 2.112 | 2.035 |       |
| hom3                | 1.900           | 2.044 | 2.026 |       | 1.986              | 2.183 | 2.169 |       |
| hom3'               | 1.936           | 2.039 | 2.025 |       | 2.035              | 2.188 | 2.166 |       |

### 3.2 Intermolecular hydrogen bond (Å), CHexDO

Tab. S4: Intermolecular H-bonding optimized at LMP2/aug-cc-pVTZ,H=cc-pVTZ.

| Molecular System    | with dispersion |       |       |       | without dispersion |       |       |       |
|---------------------|-----------------|-------|-------|-------|--------------------|-------|-------|-------|
| het2''              | 2.002           | 2.002 |       |       | 2.175              | 2.175 |       |       |
| het3 <sub>b</sub> ' | 2.176           | 2.002 | 1.873 |       | 2.378              | 2.131 | 2.007 |       |
| het3                | 1.910           | 1.988 | 1.898 |       | 2.089              | 2.139 | 2.077 |       |
| het3'               | 1.960           | 1.956 | 1.921 |       | 2.140              | 2.122 | 2.106 |       |
| het4                | 1.939           | 1.939 | 1.939 | 1.939 | 2.099              | 2.099 | 2.099 | 2.099 |
| hom2''              | 2.013           | 1.947 |       |       | 2.196              | 2.142 |       |       |
| hom3a               | 1.869           | 1.907 | 2.065 |       | 2.011              | 2.203 | 2.301 |       |
| hom3 <sub>b</sub> ' | 2.174           | 1.957 | 1.880 |       | 2.415              | 2.087 | 2.024 |       |
| hom3                | 1.866           | 1.952 | 1.942 |       | 1.987              | 2.153 | 2.159 |       |
| hom3'               | 1.923           | 1.959 | 1.948 |       | 2.055              | 2.172 | 2.173 |       |

Tab. S5: Intermolecular H-bonding optimized at B3LYP/aug-cc-pVTZ,H=cc-pVTZ.

| Molecular System    | with dispersion |       |       |       | without dispersion |       |       |       |
|---------------------|-----------------|-------|-------|-------|--------------------|-------|-------|-------|
| het2''              | 1.959           | 1.959 |       |       | 2.007              | 2.007 |       |       |
| het3 <sub>b</sub> ' | 2.137           | 1.961 | 1.853 |       | 2.175              | 2.036 | 1.908 |       |
| het3                | 1.877           | 1.950 | 1.849 |       | 1.921              | 2.005 | 1.926 |       |
| het3'               | 1.912           | 1.922 | 1.868 |       | 1.947              | 1.986 | 1.939 |       |
| het4                | 1.928           | 1.928 | 1.928 | 1.928 | 1.988              | 1.988 | 1.988 | 1.988 |
| hom2''              | 1.967           | 1.915 |       |       | 2.015              | 2.002 |       |       |
| hom3a               | 1.830           | 1.930 | 2.005 |       | 1.851              | 2.010 | 2.079 |       |
| hom3 <sub>b</sub> ' | 2.102           | 1.925 | 1.850 |       | 2.124              | 2.007 | 1.905 |       |
| hom3                | 1.834           | 1.913 | 1.896 |       | 1.860              | 2.009 | 1.993 |       |
| hom3'               | 1.860           | 1.917 | 1.907 |       | 1.898              | 2.017 | 2.003 |       |

Tab. S6: Intermolecular H-bonding optimized at SCS-LMP2/aug-cc-pVTZ,H=cc-pVTZ.

| Molecular System    | with dispersion |       |       |       | without dispersion |       |       |       |
|---------------------|-----------------|-------|-------|-------|--------------------|-------|-------|-------|
| het2''              | 2.071           | 2.071 |       |       | 2.215              | 2.215 |       |       |
| het3 <sub>b</sub> ' | 2.232           | 2.060 | 1.928 |       | 2.386              | 2.166 | 2.035 |       |
| het3                | 1.976           | 2.050 | 1.965 |       | 2.120              | 2.167 | 2.109 |       |
| het3'               | 2.031           | 2.019 | 1.993 |       | 2.171              | 2.150 | 2.138 |       |
| het4                | 2.005           | 2.005 | 2.005 | 2.005 | 2.132              | 2.132 | 2.132 | 2.132 |
| hom2''              | 2.091           | 2.015 |       |       | 2.248              | 2.174 |       |       |
| hom3a               | 1.935           | 2.046 | 2.142 |       | 2.045              | 2.229 | 2.344 |       |
| hom3 <sub>b</sub> ' | 2.257           | 2.007 | 1.934 |       | 2.443              | 2.113 | 2.052 |       |
| hom3                | 1.916           | 2.020 | 2.016 |       | 2.014              | 2.182 | 2.192 |       |
| hom3'               | 1.985           | 2.028 | 2.019 |       | 2.085              | 2.197 | 2.204 |       |

### 3.3 Intermolecular hydrogen bond (Å), Pinacol

Tab. S7: Intermolecular H-bonding optimized at LMP2/aug-cc-pVTZ,H=cc-pVTZ.

| Molecular System    | with dispersion |       |       |       | without dispersion |       |       |       |
|---------------------|-----------------|-------|-------|-------|--------------------|-------|-------|-------|
| het2''              | 1.982           | 1.982 |       |       | 2.394              | 2.394 |       |       |
| het3 <sub>b</sub> ' | 2.192           | 2.069 | 1.883 |       | 2.361              | 2.298 | 2.081 |       |
| het3'               | 1.975           | 1.980 | 1.995 |       | 2.223              | 2.207 | 2.256 |       |
| het4                | 1.963           | 1.963 | 1.963 | 1.963 | 2.185              | 2.185 | 2.185 |       |
| hom3 <sub>b</sub> ' | 1.906           | 2.099 | 2.090 |       | 2.193              | 2.306 | 2.313 |       |
| hom4                | 1.887           | 1.887 | 2.343 | 2.343 | 2.091              | 2.091 | 2.733 | 2.733 |

Tab. S8: Intermolecular H-bonding optimized at B3LYP/aug-cc-pVTZ,H=cc-pVTZ.

| Molecular System    | with dispersion |       |       |       | without dispersion |       |       |       |
|---------------------|-----------------|-------|-------|-------|--------------------|-------|-------|-------|
| het2''              | 1.965           | 1.964 |       |       | 2.066              | 2.066 |       |       |
| het3 <sub>b</sub> ' | 2.173           | 2.014 | 1.853 |       | 2.226              | 2.138 | 1.937 |       |
| het3'               | 1.909           | 1.948 | 1.923 |       | 1.999              | 2.053 | 2.055 |       |
| het4                | 1.950           | 1.950 | 1.950 | 1.950 | 2.036              | 2.036 | 2.036 | 2.036 |
| hom3 <sub>b</sub> ' | 1.916           | 1.986 | 2.094 |       | 2.014              | 2.055 | 2.234 |       |
| hom4                | 1.864           | 1.878 | 2.462 | 2.181 | 1.966              | 1.975 | 2.788 | 2.359 |



Tab. S9: Intermolecular H-bonding optimized at SCS-LMP2/aug-cc-pVTZ,H=cc-pVTZ.

| Molecular System    | with dispersion |       |       |       | without dispersion |       |       |       |
|---------------------|-----------------|-------|-------|-------|--------------------|-------|-------|-------|
| het2''              | 2.054           | 2.054 |       |       | 2.430              | 2.430 |       |       |
| het3 <sub>b</sub> ' | 2.232           | 2.144 | 1.948 |       | 2.364              | 2.331 | 2.109 |       |
| het3'               | 2.056           | 2.048 | 2.075 |       | 2.243              | 2.235 | 2.277 |       |
| het4                | 2.035           | 2.035 | 2.035 | 2.035 | 2.212              | 2.212 | 2.212 | 2.212 |
| hom3 <sub>b</sub> ' | 2.029           | 2.155 | 2.159 |       | 2.220              | 2.322 | 2.335 |       |
| hom4                | 1.953           | 1.953 | 2.473 | 2.475 | 2.113              | 2.113 | 2.758 | 2.757 |

### 3.4 Generation of density plots in Figure 4 of the main text.

To illustrate how the intermolecular O–H bond distance is affected once dispersion contributions are neglected, a kernel density estimate (KDE) plot was employed. This allows a nice visualization of the distribution of the O–H values we have and is analogous to a histogram. The data in KDE are represented using a continuous probability density curve in one or more dimensions.

Since the values of the O–H bond distances in the previous tables are within 3 decimal places, the bin width chosen to represent the data was 0.001. This permits each value to be represented in each bin, so higher frequency indicated in the plots are representatives of several repeated O–H bond distances. In this section, the analogous histogram is reflected so as to show how the data looks like before employing the continuous probability density curve via KDE.

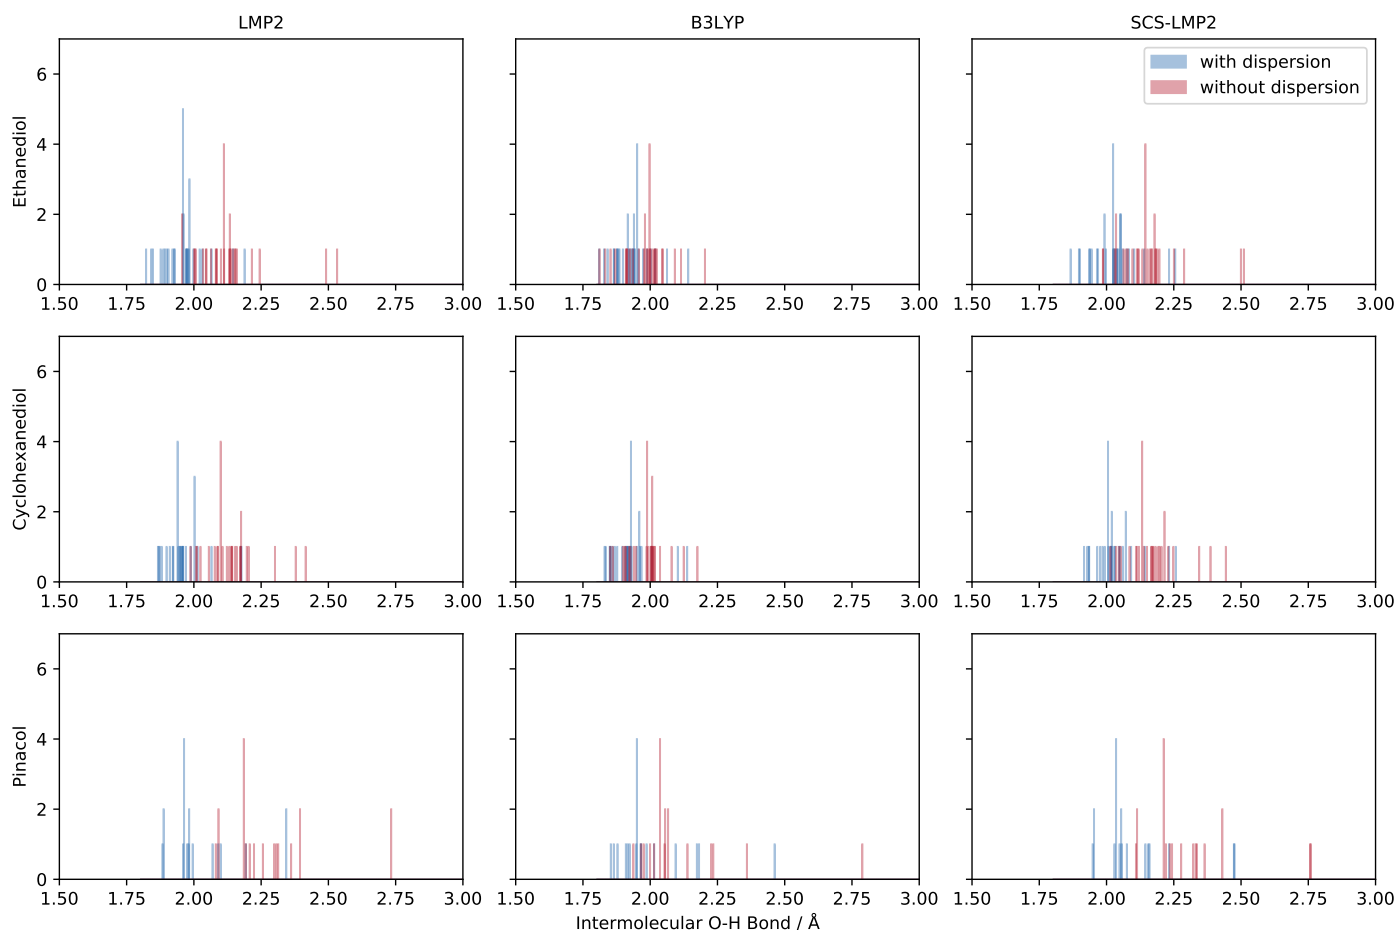

Fig. S6: Histogram counterpart of Figure 4 of the main text.

## 4 Structures

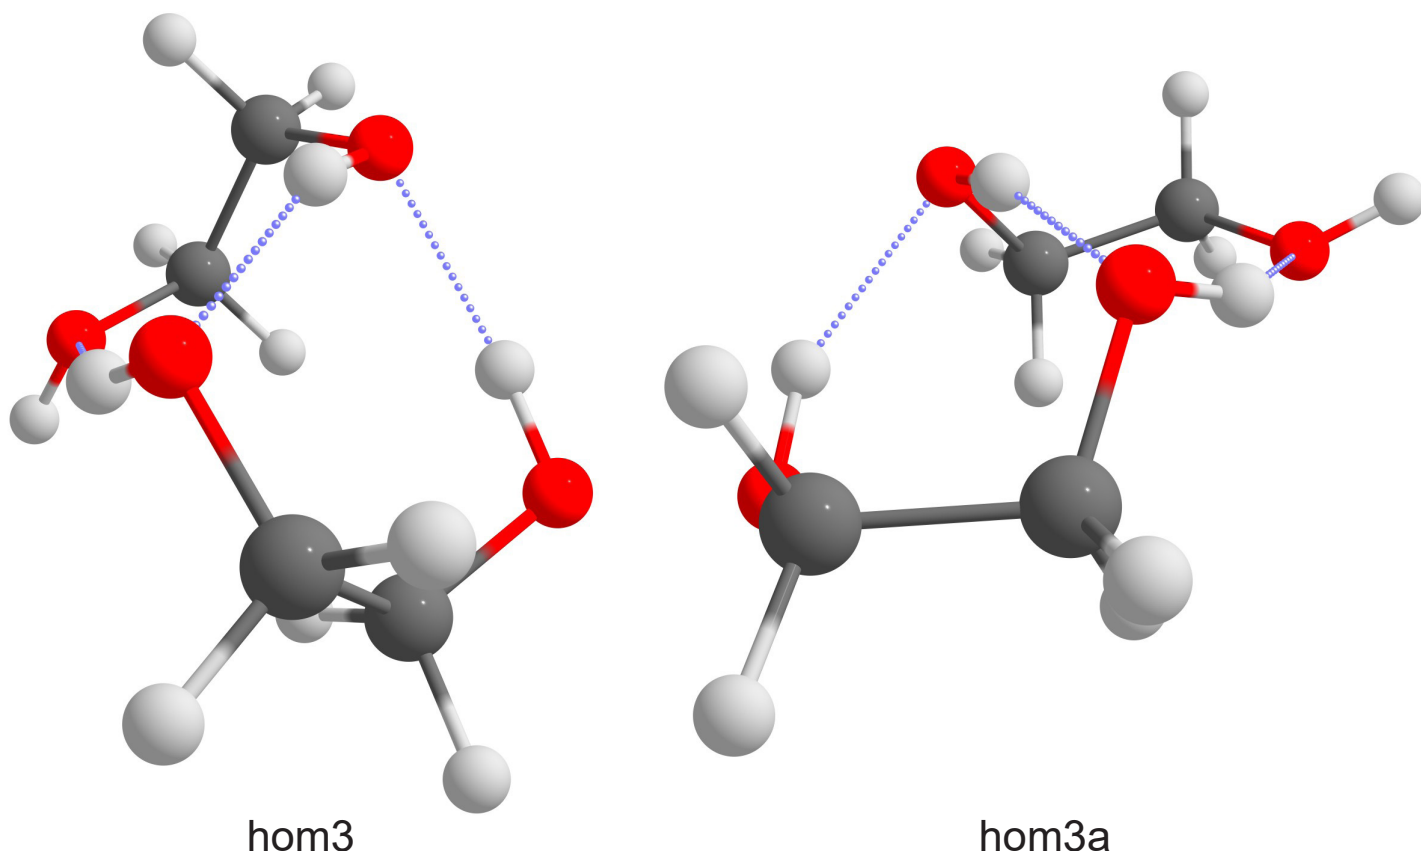

Fig. S7: Comparison of the more orthogonal arrangement of the C-C backbone of hom3 and the more parallel one of hom3a.

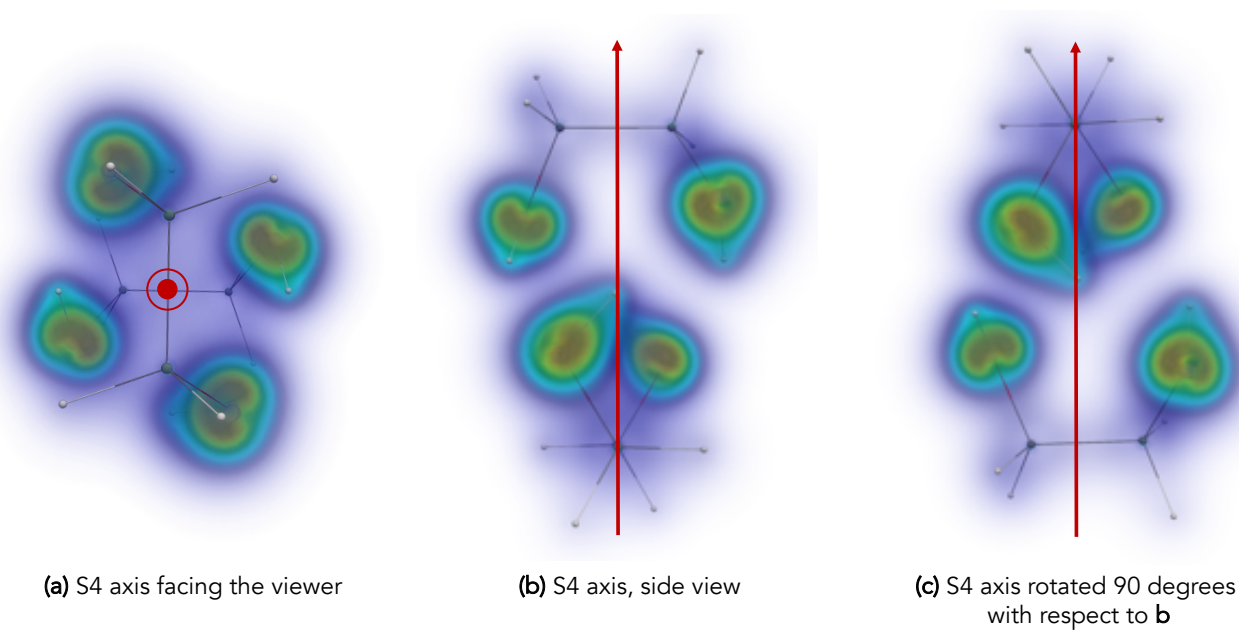

Fig. S8: Dispersion interaction density of het4 EDO viewed in different perspectives of its  $S_4$  symmetry.

## References

- [1] T. H. Dunning, "Gaussian basis sets for use in correlated molecular calculations. I. The atoms boron through neon and hydrogen", *J. Chem. Phys.* **1989**, *90*, 1007–1023.
- [2] R. A. Kendall, T. H. Dunning, R. J. Harrison, "Electron affinities of the first-row atoms revisited. Systematic basis sets and wave functions", *J. Chem. Phys.* **1992**, *96*, 6796–6806.
- [3] F. Weigend, R. Ahlrichs, "Balanced Basis Sets of Split Valence, Triple Zeta Valence and Quadruple Zeta Valence Quality for H to Rn: Design and Assessment of Accuracy", *Phys. Chem. Chem. Phys.* **2005**, *7*, 3297.
- [4] J. Zheng, X. Xu, D. G. Truhlar, "Minimally augmented Karlsruhe basis sets", *Theor. Chem. Acc.* **2011**, *128*, 295–305.
- [5] D. Rappoport, F. Furche, "Property-optimized Gaussian basis sets for molecular response calculations", *J. Chem. Phys.* **2010**, *133*, 134105.
- [6] F. Jensen, "Unifying General and Segmented Contracted Basis Sets. Segmented Polarization Consistent Basis Sets", *J. Chem. Theory Comput.* **2014**, *10*, 1074–1085.
